# Supplementary material for: The Power of Suggestion: Subjective Satiety Is Affected by Nutrient and Health-Focused Food Labelling with No Effect on Physiological Gut Hormone Release
Source: MDPI journal article supplement (doi:10.3390/nu14235100), 2022-12-01
Supplement: s1 [file s1]

**Supplementary table S1.** Changes in self-reported appetite measures according to breakfast condition (indulgent *vs.* sensible) and level of restrained eating (high *vs.* low)

|                              |          |    | Indulgent Breakfast | Sensible Breakfast |                       |                             |   |
|------------------------------|----------|----|---------------------|--------------------|-----------------------|-----------------------------|---|
| Time point                   |          |    | Sample size         | Mean change (SD)   | Mean change (SD)      | Mean difference<br>(95% CI) | P |
| High restrained eating score |          |    |                     |                    |                       |                             |   |
| Hunger                       | BL       | 26 | 68.71 (18.35)*      | 63.17 (18.38)*     | –                     | –                           |   |
|                              | BL-ANT   | 26 | 10.92 (12.55)       | 12.56 (17.61)      | –1.10 (–9.89, 7.70)   | 0.799                       |   |
|                              | ANT-POST | 26 | –56.81 (21.46)      | –51.96 (22.87)     | –5.50 (–15.28, 4.29)  | 0.258                       |   |
|                              | BL-POST  | 26 | –45.88 (22.35)      | –39.40 (19.90)     | –6.59 (–16.27, 3.08)  | 0.172                       |   |
| Satisfied                    | BL       | 26 | 30.94 (21.64)*      | 36.69 (23.81)*     | –                     |                             |   |
|                              | BL-ANT   | 26 | –5.71 (15.72)       | –10.40 (14.54)     | 4.27 (–4.13, 12.67)   | 0.305                       |   |
|                              | ANT-POST | 26 | 53.40 (26.41)       | 50.88 (24.28)      | 2.60 (–6.10, 11.30)   | 0.543                       |   |
|                              | BL-POST  | 26 | 47.69 (27.45)       | 40.48 (28.91)      | 6.87 (–3.64, 17.38)   | 0.190                       |   |
| Fullness                     | BL       | 26 | 18.96 (14.29)*      | 23.69 (19.39)*     | –                     | –                           |   |
|                              | BL-ANT   | 26 | –4.08 (8.77)        | –3.35 (13.62)      | –0.45 (–4.90, 4.00)   | 0.837                       |   |
|                              | ANT-POST | 26 | 59.94 (18.75)       | 51.42 (23.27)      | 8.48 (–2.35, 19.31)   | 0.119                       |   |
|                              | BL-POST  | 26 | 55.87 (18.21)       | 48.07 (22.15)      | 8.03 (–1.98, 18.05)   | 0.111                       |   |
| Quantity                     | BL       | 26 | 62.31 (17.36)*      | 61.94 (16.33)*     | –                     | –                           |   |
|                              | BL-ANT   | 26 | 9.98 (12.61)        | 9.04 (11.48)       | 1.08 (–6.53, 8.69)    | 0.773                       |   |
|                              | ANT-POST | 26 | –46.96 (19.31)      | –46.12 (18.68)     | –0.87 (–7.41, 5.67)   | 0.786                       |   |
|                              | BL-POST  | 26 | –36.98 (18.17)      | –37.08 (19.72)     | 0.21 (–7.62, 8.04)    | 0.957                       |   |
| Desire strength              | BL       | 26 | 69.52 (22.10)*      | 63.58 (22.50)*     | –                     | –                           |   |
|                              | BL-ANT   | 26 | 7.96 (11.78)        | 13.98 (14.05)      | –5.87 (–11.05, –0.68) | 0.028                       |   |
|                              | ANT-POST | 26 | –53.85 (22.21)      | –52.48 (19.96)     | –1.66 (–12.34, 9.02)  | 0.752                       |   |
|                              | BL-POST  | 26 | –45.88 (23.73)      | –38.50 (25.38)     | –7.53 (–17.58, 2.52)  | 0.135                       |   |
| Low restrained eating score  |          |    |                     |                    |                       |                             |   |

|                                    |          |    |                |                |                      |       |
|------------------------------------|----------|----|----------------|----------------|----------------------|-------|
| <b>Hunger</b>                      | BL       | 22 | 58.00 (19.20)* | 62.18 (21.38)* | –                    | –     |
|                                    | BL-ANT   | 22 | 20.45 (14.20)  | 14.25 (18.53)  | 5.74 (–3.54, 15.02)  | 0.212 |
|                                    | ANT-POST | 22 | –53.48 (24.00) | –47.89 (22.62) | –6.23 (–14.17, 1.72) | 0.118 |
|                                    | BL-POST  | 22 | –33.02 (23.52) | –33.64 (25.22) | –0.49 (–8.19, 7.22)  | 0.896 |
| <b>Satisfied</b>                   | BL       | 22 | 36.66 (22.89)* | 31.46 (18.36)* | –                    | –     |
|                                    | BL-ANT   | 22 | –9.25 (14.41)  | –5.45 (17.02)  | –3.42 (–12.24, 5.41) | 0.429 |
|                                    | ANT-POST | 22 | 49.59 (23.89)  | 45.30 (25.58)  | 5.24 (–3.79, 14.28)  | 0.240 |
|                                    | BL-POST  | 22 | 40.34 (27.54)  | 39.84 (20.46)  | 1.83 (–9.75, 13.40)  | 0.746 |
| <b>Fullness</b>                    | BL       | 22 | 25.50 (18.13)* | 20.52 (20.31)* | –                    | –     |
|                                    | BL-ANT   | 22 | –7.68 (10.58)  | –2.45 (15.92)  | –5.52 (–9.65, 1.39)  | 0.011 |
|                                    | ANT-POST | 22 | 53.91 (24.71)  | 48.25 (22.87)  | 5.24 (–2.20, 12.68)  | 0.157 |
|                                    | BL-POST  | 22 | 46.23 (23.60)  | 45.80 (21.04)  | –0.28 (–8.38, 7.83)  | 0.944 |
| <b><sup>a</sup>Quantity</b>        | BL       | 22 | 63.77 (15.77)* | 63.14 (15.10)* | –                    | –     |
|                                    | BL-ANT   | 22 | 11.55 (11.70)  | 11.02 (11.09)  | –0.33 (–7.42, 6.77)  | 0.924 |
|                                    | ANT-POST | 22 | –45.32 (19.10) | –44.07 (21.00) | –1.49 (–8.98, 6.01)  | 0.684 |
|                                    | BL-POST  | 22 | –33.77 (16.49) | –33.05 (19.04) | –1.81 (–10.55, 6.93) | 0.670 |
| <b><sup>b</sup>Desire strength</b> | BL       | 22 | 66.16 (21.50)* | 67.14 (19.80)* | –                    | –     |
|                                    | BL-ANT   | 22 | 13.57 (16.40)  | 10.36 (15.28)  | 2.38 (–4.13, 8.89)   | 0.455 |
|                                    | ANT-POST | 22 | –50.80 (25.19) | –41.68 (21.56) | –9.25 (–19.18, 0.68) | 0.066 |
|                                    | BL-POST  | 22 | –37.23 (29.94) | –31.32 (24.06) | –6.87 (–17.66, 3.92) | 0.199 |

Data are presented as \*baseline mean (SD), mean change (SD), and mean change difference (95% CI) in appetite measures between breakfast conditions (indulgent *vs.* sensible) adjusted for the period effect. Data analysed using paired sample t-tests adjusting for period effect, at baseline (BL), from baseline to anticipatory (BL-ANT), from anticipatory to post consumption (ANT-POST) and from baseline to post-consumption (BL-POST). <sup>a</sup>Quantity – how much do you think you could (or would want to) eat right now? <sup>b</sup>Desire strength – how strong is your desire to eat?
